# Supplementary material for: Cyclic Glycine-Proline Improves Memory and Reduces Amyloid Plaque Load in APP/PS1 Transgenic Mouse Model of Alzheimer's Disease
Source: Int J Alzheimers Dis. 2023 Mar 1;2023:1753791. doi: 10.1155/2023/1753791 (PMC9995210; doi:10.1155/2023/1753791)
Supplement: Supplementary Materials — Supplementary information contains three figures and can be found within this article. Supplementary Figure 1: efficacy of different doses of cGP on escape latency in the Morris water maze task in APP/PS1 mice. Supplementary Figure 2: cGP treatment does not affect swimming speed of mice. Supplementary Figure 3: cGP treatment does not affect the weight of mice. [file 1753791.f1.zip]

Archive with 4 entries (4 files):
- Arora and Sharma Supplementary Material (Revised).doc
- Supplementary figure 1.emf
- Supplementary figure 2.emf
- Supplementary figure 3.emf
